# Supplementary material for: Xuesaitong Protects Podocytes from Apoptosis in Diabetic Rats through Modulating PTEN-PDK1-Akt-mTOR Pathway
Source: J Diabetes Res. 2020 Jan 16;2020:9309768. doi: 10.1155/2020/9309768 (PMC6995497; doi:10.1155/2020/9309768)
Supplement: Supplementary Materials — Effects of XST on 8-OHdG and 4-hydroxy-2-nonenalin expression in diabetic kidneys. Representative immunohistochemical staining for 8-OHdG (A) and 4-hydroxy-2-nonenalin (B) in glomerulus. Quantitative analysis for 8-OHdG (C) and 4-hydrox y-2-nonenalin (D). Scale bar = 100 μm. #P < 0.05 vs. normal; ∗P < 0.05 vs. model. [file 9309768.f1.docx]

**Supplementary Materials**

# Journal of Diabetes Research

# Xuesaitongprotectspodocytes from apoptosis in diabetic rats through modulating PTEN-PDK1-Akt-mTOR pathway

Rui Xue1, Ruonan Zhai1, Ling Xie2, Zening Zheng3, Guihua Jian1, Teng Chen4, Jun Su1, Chongting Gao1, Niansong Wang1, Xifei Yang5,Youhua Xu6, Dingkun Gui1

1Department of Nephrology, Shanghai Jiao Tong University Affiliated Sixth People’s Hospital, Shanghai,200233,China.

2Shanghai Ocean University, Shanghai, 201306, China.

3Guangzhou University of Traditional Chinese Medicine, Guangzhou, 510405, China.

4Shanghai University of Traditional Chinese Medicine, Shanghai, 201203, China.

5Key Laboratory of Modern Toxicology of Shenzhen, Shenzhen Center for Disease Control and Prevention, Shenzhen, 518055, China.

6Faculty of Chinese Medicine, State Key Laboratory of Quality Research in Chinese Medicine,Macau University of Science and Technology, Taipa, Macao, 999078, China.

Correspondence should be addressed to DingkunGui; dingkungui@alu.fudan.edu.cn, Xifei Yang; xifeiyang@gmail.com andYouhua Xu; yhxu@must.edu.mo

Excessive production of reactive oxygen species (ROS) is widely recognized as a critical factor leading to podocyte apoptosis induced by hyperglycaemia. 8-hydroxy-2'-deoxyguanosine (8-OHdG) and 4-hydroxy-2-nonenalin are repair products of oxidized guanine lesions and have been acknowledged as biomarkers of oxidative stress. Here, we added the immunohistochemical staining of ROS markers such as 8-OHdG and the 4-hydroxy-2-nonenalin to examine the effects of on expression of ROS markers in kidney.

**Materials and Methods**

**Immunohistochemical staining**

Immunohistochemical staining were performed 4μm paraffin-embedded renal sections after a descending ethanol gradient of dewaxing. Antibodies of 8-OHdG (N45.1) and the 4-hydroxy-2-nonenalin (HNEJ-2) were 1:200 diluted in PBS and then incubated overnight at 4°C. These sections incubated with TBST were chosen as negative controls. After incubation with horseradish peroxidase (HRP) conjugated anti-rabbit and anti-mouse IgG antibodies for 1 hour at 37°C, the sections were visualized by DAB solution. Pathological Image J software analysis system (Adobe Corp, USA) was used for quantitative analysis. All slides were analysed by two unaware investigators in a blinded manner.

**Results**

**Effects of XST on expression of****8-OHdG and the** **4-hydroxy-2-nonenalinin diabetic rats**

We added the immunohistochemical staining for 8-OHdG and 4-hydroxy-2-nonenalin in kidneys. We demonstrated that 8-OHdG and 4-hydroxy-2-n

onenalin expression were markedly elevated in diabetic kidneys, however, XST reduced the expression of ROS markers such as 8-OHdG and 4-hydroxy-2-nonenal in kidneys. (Supplementary Figure 1).


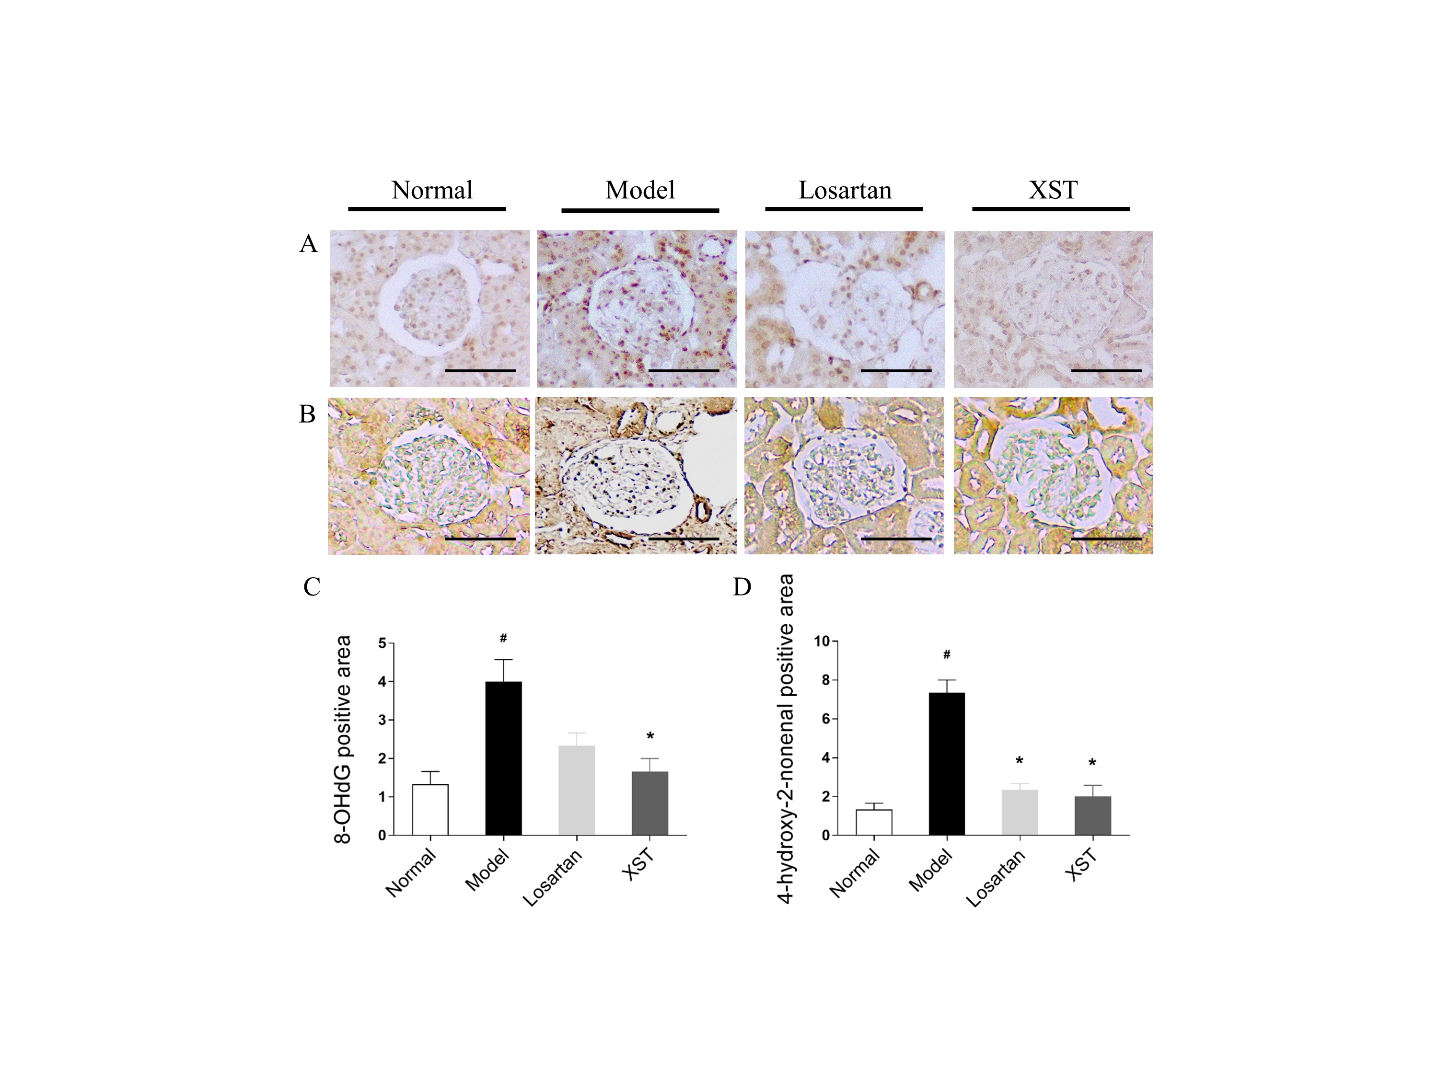


**Supplementary Figure 1.** Effects of XST on 8-OHdG and 4-hydroxy-2-nonenalin expression in diabetic kidneys. Representative immunohistochemical staining for 8-OHdG (A) and 4-hydroxy-2-nonenalin (B) in glomerulus. Quantitative analysis for 8-OHdG (C) and 4-hydrox y-2-nonenalin (D). Scale bar = 100 μm.  #*P*<0.05 vs Normal; **P*<0.05 vs Model.
